# Supplementary material
Source: Springer Nature journal article supplement (https://www.springermedizin.de/resource/supplementary/12936_2011_1946_MOESM14_ESM.pdf/9542110)
Supplement: MOESM14 [file 9542110]

MFD: 10112006

LOT: 031106

EXP: 11/2009

# COTECXIN<sup>®</sup>

## Dihydroartemisinin Tablets

60mg x 8 tablets

All forms of malaria. Orally, once a day, for 5 or 7 days in succession. See enclosed insert.

Jiaxing Nanhu Pharmaceutical Co., Ltd.  
No. 205, Yunhai Road, Economy Development Zone, Jiaxing City

Mfg. under license of:  
Beijing Holley-Cotec Pharmaceuticals Co., Ltd.

Keep out of reach of children.  
Preserve in well closed, light-resistant containers.  
Store in a cool place.

1-4

Comprimé de Dihydroartémisinine

# COTECXIN<sup>®</sup>

60mg x 8 comprimés

Toutes sortes de malaria. Voie buccale, une fois le jour, 5 à 7 jours consécutifs. Voir les instructions ci-incluses.

Jiaxing Nanhu Pharmaceutique S.A.R.L.  
205 Avenue Yunhai, Zone de Développement Economique, Jiaxing Chine

Sous licence de  
Laboratoires Pharmaceutiques Beijing-Holley-Cotec
